# Supplementary material for: Zika Virus Non-Structural Protein 1 Antigen-Capture Immunoassay
Source: MDPI journal article supplement (doi:10.3390/v13091771), 2021-09-05
Supplement: s1 [file s1]

## SUPPLEMENTAL MATERIALS

### Zika Virus Non-Structural Protein 1 Antigen-Capture Immunoassay

Figure 2A

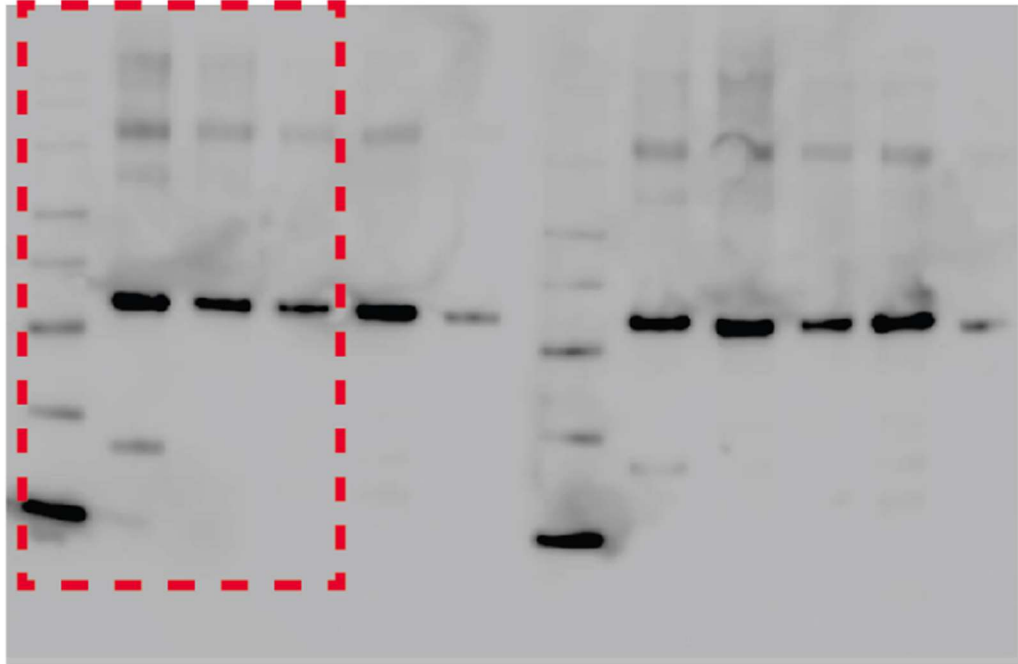

Figure 2B

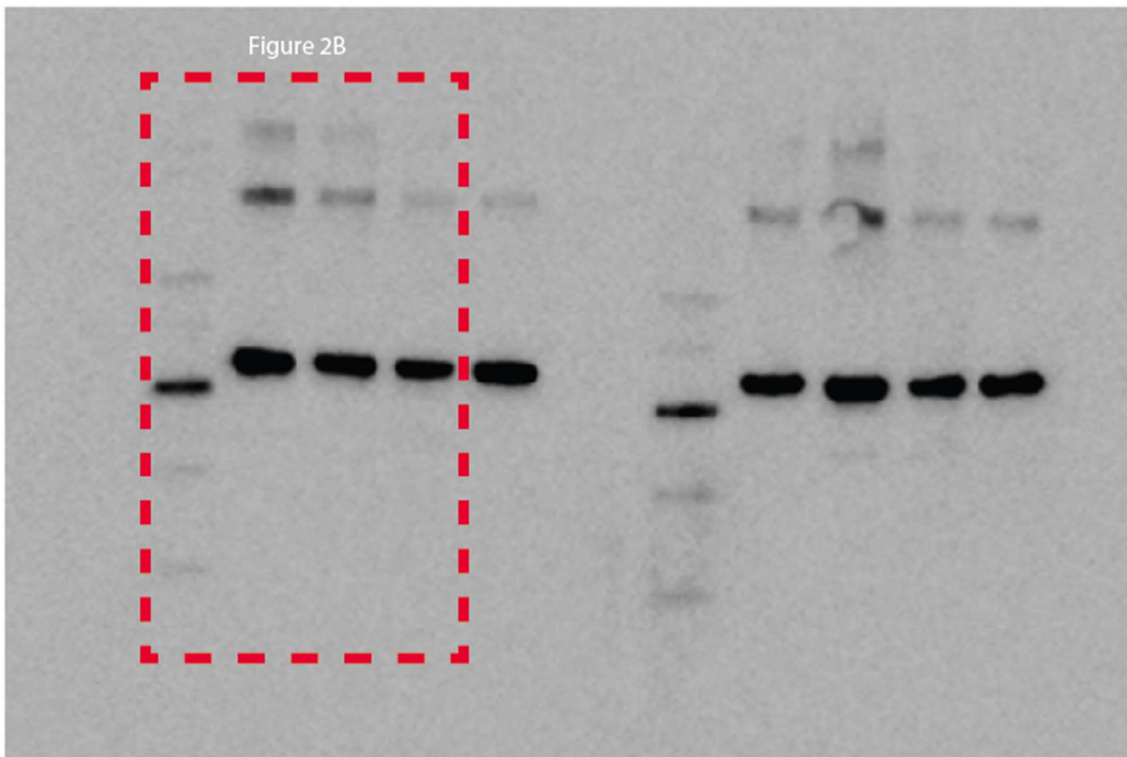

**Figure S1.** Uncropped gel images for Figure 2.

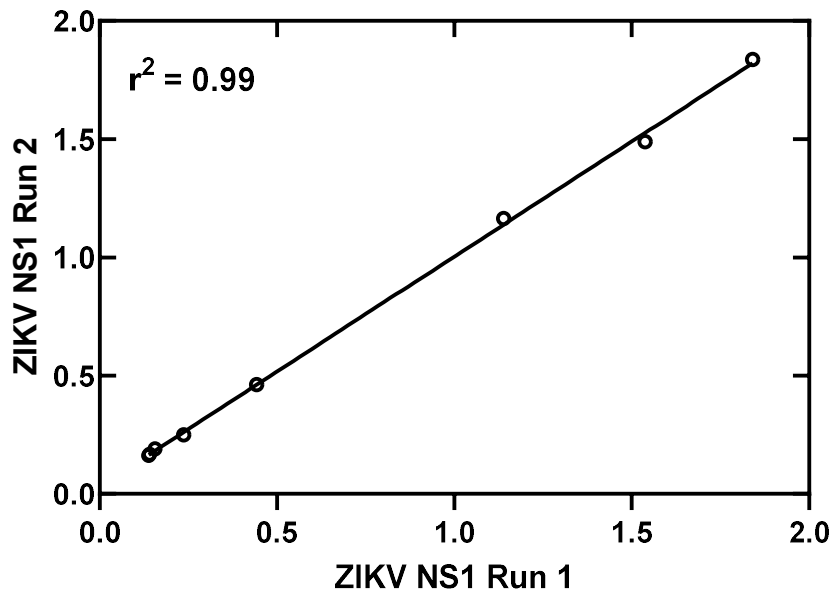

**Figure S2.** Antigen capture assay shows consistency between runs. Two runs using the same preparation of anti-ZIKV NS1 pAbs.  $P < 0.0001$ , as determined through Spearman correlation.

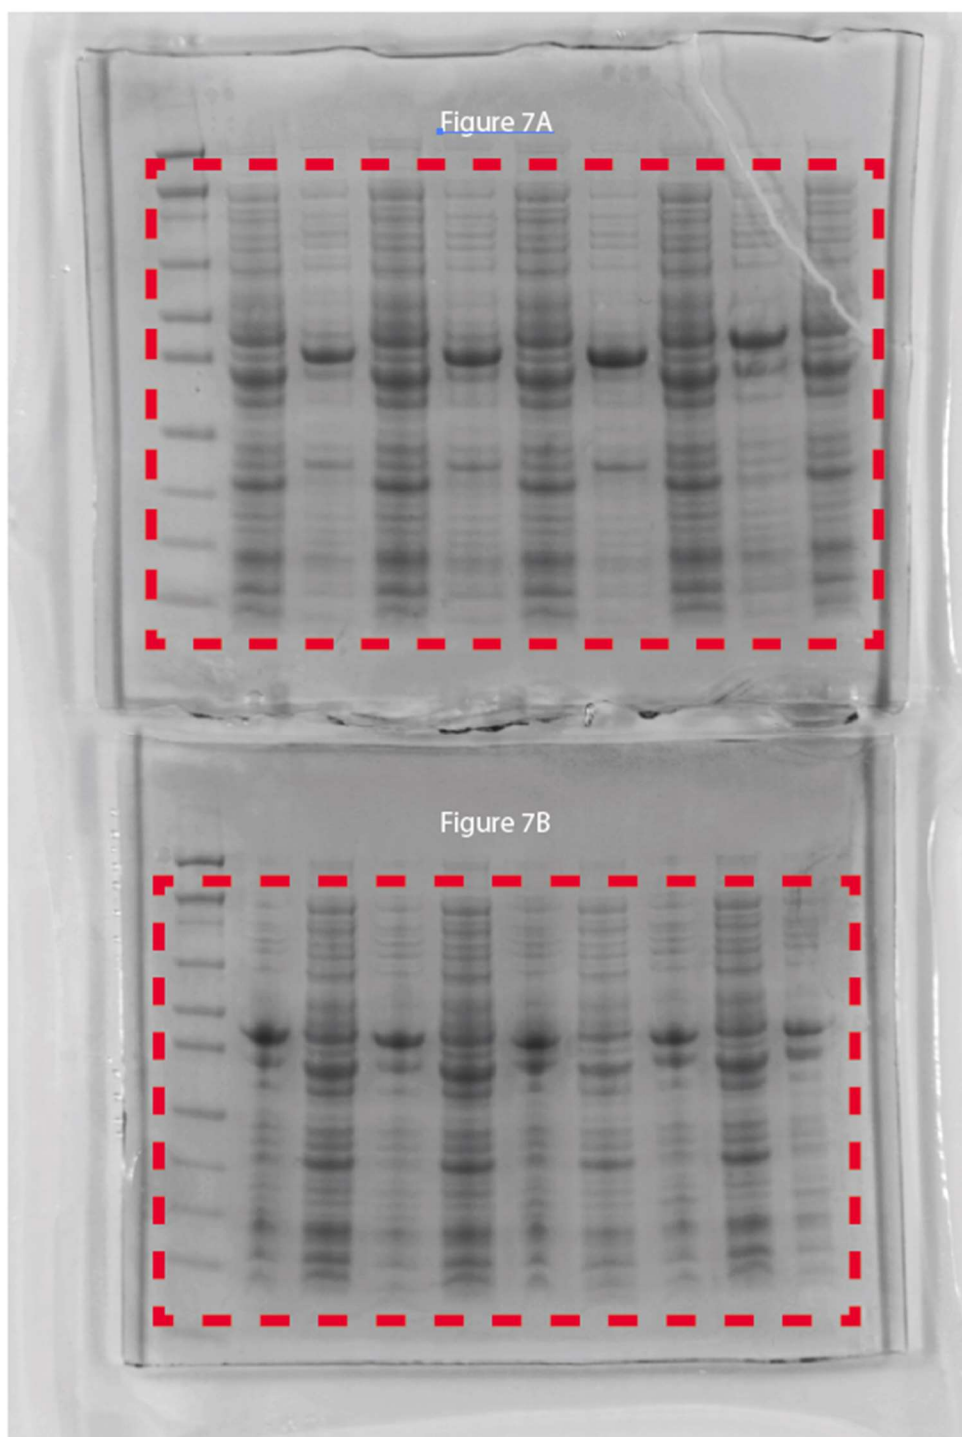

**Figure S3.** Uncropped gel images for Figure 7.

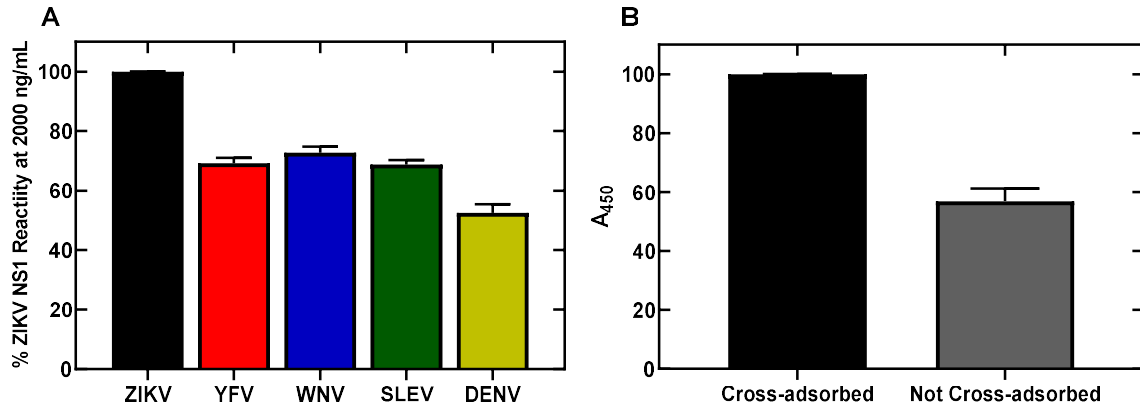

**Figure S4.** Reactivity of NS1 antibodies without cross-adsorption. (A) Related Flavivirus reactivity using NS1 antibodies non-adsorbed against DENV NS1 shows binding at a high percentage of ZIKV NS1 levels. (B) Comparison of ZIKV NS1 reactivity using adsorbed and non-adsorbed NS1 antibodies shows higher signal intensities of cross-adsorbed antibodies to ZIKV NS1 protein.

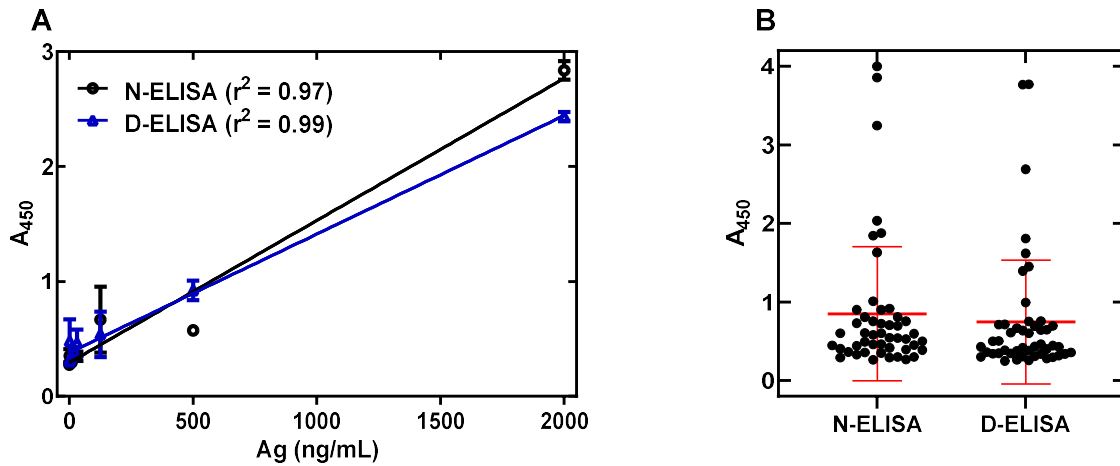

**Figure S5.** ZIKV NS1 Capture ELISA does not display interference from substances in patient serum. Antibodies against NS1 were dissociated from antigen via detergent and assayed for increased activity using the antigen capture ELISA. (A) The assay was still able to detect ZIKV NS1 well in both N-ELISA (dissociation solution was neutralized before addition of NS1) and D-ELISA (dissociation solution was neutralized in the presence of NS1). (B) No significant difference was seen in ZIKV NS1 detection in patient samples between N-ELISA and D-ELISA conditions as determined by Mann-Whitney test.

**Table S1.** Primer sequences used for the generation and mutation of ZIKV/DENV NS1.

| Primer Designation  | Primer Sequence                                                       |
|---------------------|-----------------------------------------------------------------------|
| ZIKV NS1 WT F       | 5'-ATCGATGGATCCCGTGGGGTGCTCAGTGGAC-3'                                 |
| ZIKV NS1 WT R       | 5'-ATCGATAAGCTTTTATGACCCCGCTGTCACCA-3'                                |
| DENV2 NS1 WT F      | 5'-ATCGATGGATCCCGATAGTGTTGCGTTGTG-3'                                  |
| DENV2 NS1 WT R      | 5'-ATCGATGCGGCCGCCTTAGGCTGTGACCAAGGAGC-3'                             |
| 117, 118, 119-AAA F | 5'-ATGAGCTGCCCCATGGCTGGAAGCCGCTGCAGCATCGTATTTTGTAGG-3'                |
| 117, 118, 119-AAA R | 5'-CTGTTGTTGGTCTTTGCCGCCCTAACAAAATACGATGCTGCAGCGGCTTTC CAGCCG-3'      |
| 227, 228, 229-AAA F | 5'-GAATGGCCAAAGTCTGCCGCTGCCTGGACAGATGGAGTAGAAGAAAGTGATCTTATCATACCC-3' |
| 227, 228, 229-AAA R | 5'-CTCCATCTGTCCAGGCAGCGGCAGACTTTGGCCATTACATGTTTTTCATCTCAATCAGGTG-3'   |

**Table S2.** Primers used for the Generation of Flavivirus NS1 Proteins.

| Primer Designation | Primer Sequence                           |
|--------------------|-------------------------------------------|
| SLEV NS1 WT F      | 5'-ATCGATGGATCCCGCTGATTCGGGATGTGCA-3'     |
| SLEV NS1 WT R      | 5'-ATCGATAAGCTTTTAAGCTGTCACTCGAGATTT-3'   |
| WNV NS1 WT F       | 5'-ATCGATGGATCCCGACACTGGGTGTGCCATA-3'     |
| WNV NS1 WT R       | 5'-ATCGATGCGGCCGCTTAAGCATTCACCTTGACTG-3'  |
| YFV NS1 WT F       | 5'-ATCGATCAATTGCCAAGGATGCGCCATCAAC-3'     |
| YFV NS1 WT R       | 5'-ATCGATGCGGCCGCTTATATTTCTCCAGCTGTAAC-3' |

**Table S3.** NS1/IgM/IgG Levels in Surveyed Patient Serum. Sample ID numbers beginning with Z originate from Colombia, while those beginning with DR originate from the Dominican Republic.

| Sample ID | IgM WT  | IgM 117-119 | IgM 227-229 | IgG WT  | IgG 117-119 | IgG 227-229 | NS1 Concentration (ng/mL) |
|-----------|---------|-------------|-------------|---------|-------------|-------------|---------------------------|
| Z-10      | 0.18675 | 0.13835     | 0.12285     | 1.20945 | 1.11725     | 1.14445     | 82.05                     |
| Z-100     | 0.18045 | 0.12485     | 0.12275     | 0.59875 | 0.7307      | 0.61055     | 83.98                     |
| Z-101     | 0.1868  | 0.1559      | 0.10545     | 1.88775 | 1.86325     | 1.82465     | ND                        |
| Z-102     | 0.1221  | 0.1034      | 0.0889      | 1.41885 | 1.4985      | 1.4237      | 221.8                     |
| Z-103     | 0.5427  | 0.34535     | 0.1813      | 0.12735 | 0.0831      | 0.07875     | 73.8                      |
| Z-104     | 0.19075 | 0.1023      | 0.0616      | 0.4231  | 0.4824      | 0.4387      | 11.68                     |
| Z-105     | 0.3016  | 0.19225     | 0.12755     | 1.77325 | 1.7653      | 1.76545     | 10.48                     |
| Z-106     | 0.5318  | 0.31145     | 0.1454      | 1.05435 | 1.18865     | 1.1215      | 60.99                     |
| Z-107     | 0.1959  | 0.10525     | 0.0644      | 0.8615  | 1.04225     | 0.93125     | 54.11                     |
| Z-110     | 0.35795 | 0.2078      | 0.09665     | 1.78745 | 1.78155     | 1.7858      | 625.48                    |
| Z-115     | 0.18385 | 0.1088      | 0.04575     | 1.86325 | 1.82935     | 1.6451      | 354.03                    |
| Z-116     | 0.1003  | 0.0811      | 0.07025     | 1.9695  | 2.05525     | 1.97125     | 50.31                     |
| Z-117     | 0.11065 | 0.07645     | 0.05305     | 1.9428  | 1.92395     | 1.95725     | ND                        |
| Z-118     | 0.0924  | 0.08855     | 0.0584      | 1.88995 | 1.87645     | 1.8721      | 36.34                     |
| Z-119     | 0.2128  | 0.14365     | 0.1116      | 1.7582  | 1.75715     | 1.7436      | ND                        |
| Z-12      | 0.1454  | 0.10885     | 0.17605     | 2.13385 | 1.99755     | 2.00915     | ND                        |
| Z-120     | 0.5909  | 0.8051      | 0.55625     | 1.6434  | 1.65535     | 1.632       | 72.17                     |
| Z-121     | 0.1013  | 0.09255     | 0.05955     | 1.7243  | 1.7405      | 1.69705     | 81.26                     |
| Z-122     | 0.26625 | 0.1755      | 0.11025     | 1.46965 | 1.56365     | 1.5706      | 101.9                     |
| Z-123     | 0.32225 | 0.2368      | 0.1847      | 1.9463  | 1.983       | 1.97375     | ND                        |
| Z-124     | 0.10315 | 0.0859      | 0.0675      | 1.85715 | 1.8266      | 2.00635     | 17.93                     |
| Z-125     | 0.10775 | 0.09165     | 0.0798      | 0.14495 | 0.13275     | 0.11665     | ND                        |
| Z-126     | 0.59    | 1.13835     | 1.14065     | 1.8974  | 1.90265     | 1.86705     | ND                        |
| Z-127     | 0.28025 | 0.341       | 0.3252      | 1.9503  | 1.9229      | 1.84155     | 21.25                     |
| Z-128     | 0.2137  | 0.1842      | 0.14925     | 1.77175 | 1.71435     | 1.59895     | ND                        |
| Z-129     | 0.335   | 0.29555     | 0.2833      | 1.4611  | 1.5747      | 1.4368      | ND                        |
| Z-13      | 0.1848  | 0.12995     | 0.1248      | 1.79835 | 1.73535     | 1.7803      | ND                        |
| Z-130     | 0.2383  | 0.1407      | 0.39475     | 0.9602  | 1.1003      | 0.95095     | 88.2                      |
| Z-131     | 0.15395 | 0.1328      | 0.1037      | 2.00515 | 1.896       | 1.9032      | 219.51                    |
| Z-132     | 0.13245 | 0.1287      | 0.11295     | 2.0958  | 1.95755     | 2.0976      | ND                        |
| Z-133     | 0.1442  | 0.12745     | 0.1121      | 1.83025 | 1.8161      | 1.8482      | ND                        |
| Z-134     | 0.1425  | 0.1176      | 0.0942      | 0.7335  | 0.636       | 0.5691      | 233.32                    |
| Z-135     | 0.10035 | 0.0925      | 0.06955     | 1.9588  | 1.91895     | 1.90325     | ND                        |
| Z-136     | 0.29165 | 0.27365     | 0.26655     | 1.4938  | 1.53255     | 1.38375     | ND                        |
| Z-137     | 0.1748  | 0.1166      | 0.09645     | 0.73785 | 0.77865     | 0.6258      | 36.02                     |
| Z-138     | 0.2014  | 0.1909      | 0.2081      | 0.21675 | 0.2691      | 0.19655     | ND                        |
| Z-139     | 0.2412  | 0.1951      | 0.1497      | 1.87225 | 1.8687      | 1.84365     | ND                        |

|              |         |         |         |         |         |         |         |
|--------------|---------|---------|---------|---------|---------|---------|---------|
| <b>Z-14</b>  | 0.2553  | 0.24155 | 0.2261  | 1.9442  | 1.86725 | 1.95525 | –       |
| <b>Z-140</b> | –       | –       | –       | –       | –       | –       | 269.39  |
| <b>Z-141</b> | 0.2237  | 0.1593  | 0.1923  | 1.0021  | 1.24345 | 1.29265 | 58.7    |
| <b>Z-142</b> | 0.245   | 0.2791  | 0.27705 | 0.28615 | 0.34375 | 0.2863  | ND      |
| <b>Z-143</b> | 0.42235 | 0.274   | 0.22865 | 1.65795 | 1.717   | 1.6307  | 387.84  |
| <b>Z-144</b> | 0.1385  | 0.1042  | 0.07425 | 2.01175 | 1.94975 | 1.85175 | ND      |
| <b>Z-145</b> | 0.50845 | 0.44485 | 0.40785 | 1.88245 | 1.8902  | 1.81805 | ND      |
| <b>Z-146</b> | 0.3082  | 0.20185 | 0.11865 | 1.7067  | 1.825   | 1.723   | ND      |
| <b>Z-147</b> | 0.07735 | 0.0752  | 0.0489  | 1.30535 | 1.3551  | 1.3287  | ND      |
| <b>Z-148</b> | 0.3067  | 0.2744  | 0.24635 | 1.8125  | 1.76145 | 1.85785 | 30.3    |
| <b>Z-149</b> | 0.28285 | 0.24735 | 0.19545 | 1.97425 | 1.93575 | 2.00455 | 84.92   |
| <b>Z-150</b> | 0.2269  | 0.1854  | 0.12305 | 1.8652  | 1.8393  | 1.8893  | ND      |
| <b>Z-151</b> | 0.27795 | 0.2344  | 0.1948  | 1.911   | 1.9248  | 1.88705 | ND      |
| <b>Z-152</b> | 0.28935 | 0.24915 | 0.2001  | 1.483   | 1.6654  | 1.4719  | ND      |
| <b>Z-153</b> | 0.3201  | 0.24765 | 0.23835 | 1.55675 | 1.7059  | 1.6278  | ND      |
| <b>Z-154</b> | 0.0911  | 0.0858  | 0.07965 | 1.85525 | 1.97365 | 1.89725 | ND      |
| <b>Z-155</b> | 0.2276  | 0.1663  | 0.1441  | 1.75755 | 1.87555 | 1.79605 | 2224.9  |
| <b>Z-157</b> | 0.0973  | 0.0973  | 0.0583  | 2.0347  | 2.0291  | 1.88515 | 1970.42 |
| <b>Z-158</b> | 0.29395 | 0.29395 | 0.16985 | 1.96405 | 1.91655 | 1.76825 | 215.39  |
| <b>Z-159</b> | 0.10485 | 0.10485 | 0.05615 | 0.16    | 0.13385 | 0.10675 | 29.22   |
| <b>Z-16</b>  | 0.4187  | 0.2703  | 0.33215 | 2.0692  | 1.94725 | 2.06395 | 45.99   |
| <b>Z-160</b> | 0.1442  | 0.1442  | 0.0574  | 1.55275 | 1.5792  | 1.4184  | 131.56  |
| <b>Z-161</b> | 0.3592  | 0.3592  | 0.12335 | 2.04005 | 1.9368  | 1.811   | 311.05  |
| <b>Z-162</b> | 0.3122  | 0.3122  | 0.1169  | 0.8183  | 0.78715 | 0.6504  | ND      |
| <b>Z-163</b> | 0.22695 | 0.22695 | 0.13395 | 1.4193  | 1.4626  | 1.2019  | ND      |
| <b>Z-164</b> | 0.4344  | 0.4344  | 0.22625 | 0.9534  | 0.9789  | 0.7495  | 136.43  |
| <b>Z-165</b> | 0.3721  | 0.3721  | 0.21275 | 1.9818  | 1.9589  | 1.80145 | 110.54  |
| <b>Z-166</b> | 0.4125  | 0.4125  | 0.25475 | 1.72945 | 1.72055 | 1.4958  | ND      |
| <b>Z-167</b> | 0.2901  | 0.2901  | 0.20045 | 1.8583  | 1.85295 | 1.80355 | ND      |
| <b>Z-168</b> | 0.10585 | 0.10585 | 0.07455 | 0.4654  | 0.4438  | 0.7577  | ND      |
| <b>Z-169</b> | 0.36165 | 0.36165 | 0.17725 | 1.10865 | 1.06755 | 1.15185 | 75.23   |
| <b>Z-17</b>  | 0.347   | 0.19665 | 0.20805 | 1.37585 | 1.1515  | 1.316   | 104.32  |
| <b>Z-170</b> | 0.31445 | 0.31445 | 0.2202  | 0.20205 | 0.1584  | 0.9291  | 80.62   |
| <b>Z-171</b> | 0.25225 | 0.25225 | 0.15275 | 1.4979  | 1.53325 | 1.4431  | 123.14  |
| <b>Z-172</b> | 0.25345 | 0.25345 | 0.14675 | 1.7365  | 1.73045 | 1.39885 | 44.95   |
| <b>Z-173</b> | 0.1864  | 0.1864  | 0.0476  | 1.88295 | 1.8239  | 1.77385 | ND      |
| <b>Z-174</b> | 0.31205 | 0.31205 | 0.1711  | 1.4173  | 1.40435 | 1.36255 | 30.32   |
| <b>Z-175</b> | 0.133   | 0.133   | 0.1222  | 1.80045 | 1.8371  | 1.816   | 75.87   |
| <b>Z-176</b> | 0.07065 | 0.07065 | 0.04755 | 1.19785 | 1.22845 | 1.2073  | ND      |
| <b>Z-177</b> | 0.11585 | 0.11585 | 0.06905 | 1.51245 | 1.5014  | 1.446   | 393.65  |
| <b>Z-178</b> | 0.3342  | 0.3342  | 0.2245  | 1.97355 | 1.9264  | 1.83475 | 99.65   |

|       |         |         |         |         |         |         |         |
|-------|---------|---------|---------|---------|---------|---------|---------|
| Z-179 | 0.1483  | 0.1483  | 0.0924  | 1.88545 | 1.8379  | 1.68495 | ND      |
| Z-18  | 0.82585 | 0.8989  | 0.8764  | 2.17995 | 2.08175 | 2.1593  | ND      |
| Z-180 | 0.20385 | 0.20385 | 0.1001  | 1.5866  | 1.59005 | 1.3541  | ND      |
| Z-181 | 0.21545 | 0.21545 | 0.1011  | 1.79655 | 1.70395 | 1.70775 | 154.22  |
| Z-182 | 0.2531  | 0.2531  | 0.77915 | 1.96735 | 1.90445 | 1.86915 | 76.67   |
| Z-183 | 0.1187  | 0.1187  | 0.0737  | 1.8534  | 1.81235 | 1.8609  | 290.05  |
| Z-185 | 0.11005 | 0.11005 | 0.0667  | 0.48025 | 0.4041  | 0.4594  | ND      |
| Z-187 | 0.11115 | 0.11115 | 0.076   | 2.07605 | 1.94445 | 1.90215 | 426.76  |
| Z-188 | 0.29945 | 0.29945 | 0.14505 | 2.02945 | 1.8909  | 1.85105 | 148.28  |
| Z-189 | 0.1754  | 0.1754  | 0.06205 | 1.7437  | 1.59945 | 1.58855 | 88.93   |
| Z-19  | 0.28355 | 0.19635 | 0.2093  | 0.40865 | 0.30955 | 0.32515 | ND      |
| Z-191 | 0.23635 | 0.23635 | 0.16105 | 2.16735 | 2.02285 | 1.96965 | 81.34   |
| Z-192 | 0.42055 | 0.3672  | 0.3458  | 0.6123  | 0.8245  | 0.8703  | 128.7   |
| Z-193 | 0.13585 | 0.09715 | 0.09015 | 2.04405 | 2.153   | 2.0501  | ND      |
| Z-194 | 0.19975 | 0.1472  | 0.15495 | 0.27455 | 0.2828  | 0.25855 | 974.72  |
| Z-195 | 0.7876  | 0.6972  | 0.7514  | 1.44715 | 1.6799  | 1.6835  | 58.36   |
| Z-196 | 0.2498  | 0.1925  | 0.17915 | 0.98695 | 1.25535 | 1.23515 | ND      |
| Z-197 | 0.4337  | 0.2904  | 0.3699  | 0.9509  | 1.1214  | 1.0011  | 76.86   |
| Z-198 | 0.24885 | 0.20025 | 0.20225 | 0.8044  | 0.87015 | 0.85485 | ND      |
| Z-199 | 0.27275 | 0.26885 | 0.2395  | 2.0184  | 2.13165 | 2.0367  | 64.69   |
| Z-20  | 0.20355 | 0.1613  | 0.17315 | 1.69    | 1.6782  | 1.6789  | ND      |
| Z-200 | –       | –       | –       | –       | –       | –       | 1277.94 |
| Z-202 | 0.4921  | 0.50295 | 0.5169  | 1.92995 | 2.0421  | 2.01765 | ND      |
| Z-21  | 0.64465 | 0.55325 | 0.49085 | 0.8335  | 0.85725 | 0.8142  | ND      |
| Z-22  | 0.3695  | 0.28635 | 0.2406  | 1.9451  | 1.8883  | 1.8351  | ND      |
| Z-23  | 0.25055 | 0.19355 | 0.17165 | 1.9541  | 1.86585 | 1.876   | ND      |
| Z-237 | 0.31225 | 0.15925 | 0.1819  | 0.20945 | 0.1734  | 0.17695 | –       |
| Z-238 | 0.1825  | 0.1115  | 0.11135 | 0.48935 | 0.59735 | 0.6182  | –       |
| Z-239 | 0.1682  | 0.0951  | 0.10215 | 0.38095 | 0.41435 | 0.4214  | –       |
| Z-24  | 0.2169  | 0.16275 | 0.1614  | 2.006   | 1.88895 | 1.9052  | 554.32  |
| Z-240 | 0.1566  | 0.10155 | 0.10785 | 0.36965 | 0.392   | 0.4085  | –       |
| Z-241 | 0.30035 | 0.21315 | 0.22715 | 0.6306  | 0.74915 | 0.7864  | –       |
| Z-242 | 0.19815 | 0.14335 | 0.1403  | 0.4009  | 0.66125 | 0.7135  | –       |
| Z-243 | 0.1527  | 0.08845 | 0.0845  | 0.41205 | 0.36935 | 0.35185 | –       |
| Z-244 | 0.2309  | 0.1578  | 0.15525 | 0.4848  | 0.4492  | 0.48665 | –       |
| Z-245 | 0.1382  | 0.0975  | 0.09775 | 0.24245 | 0.22545 | 0.2328  | –       |
| Z-246 | 0.09275 | 0.0592  | 0.06615 | 0.22445 | 0.2415  | 0.23645 | –       |
| Z-247 | 0.2952  | 0.27395 | 0.27515 | 0.4086  | 0.4947  | 0.5101  | –       |
| Z-248 | 0.1991  | 0.133   | 0.1341  | 0.7241  | 0.732   | 0.75715 | –       |
| Z-249 | 0.148   | 0.10925 | 0.11235 | 0.33705 | 0.34745 | 0.3316  | –       |
| Z-25  | 0.19095 | 0.1324  | 0.12165 | 1.9869  | 1.89005 | 1.923   | ND      |



|       |         |         |         |         |         |         |        |
|-------|---------|---------|---------|---------|---------|---------|--------|
| Z-250 | 0.5324  | 0.34425 | 0.3553  | 0.3516  | 0.42515 | 0.4041  | —      |
| Z-251 | 0.09235 | 0.0899  | 0.07505 | 0.78945 | 0.84745 | 0.8697  | —      |
| Z-252 | 0.18625 | 0.12565 | 0.1345  | 0.41425 | 0.51015 | 0.5498  | —      |
| Z-253 | 0.12585 | 0.07495 | 0.0855  | 0.43485 | 0.5486  | 0.57155 | —      |
| Z-254 | 0.35375 | 0.1805  | 0.20305 | 0.3387  | 0.3844  | 0.40415 | —      |
| Z-255 | 0.078   | 0.0602  | 0.0692  | 0.5039  | 0.60715 | 0.64475 | —      |
| Z-256 | 0.12205 | 0.12705 | 0.1374  | 1.53605 | 1.6347  | 1.7081  | —      |
| Z-257 | 0.11355 | 0.0805  | 0.08995 | 0.0689  | 0.0606  | 0.0566  | —      |
| Z-258 | 0.11525 | 0.09205 | 0.09775 | 0.28385 | 0.2433  | 0.22905 | —      |
| Z-259 | 0.1749  | 0.14505 | 0.19065 | 0.23905 | 0.2813  | 0.2836  | —      |
| Z-26  | 0.15945 | 0.1306  | 0.13065 | 1.9216  | 1.788   | 1.78975 | ND     |
| Z-260 | 0.33095 | 0.2642  | 0.30345 | 0.62425 | 0.6791  | 0.7911  | —      |
| Z-261 | 0.4041  | 0.3056  | 0.33405 | 0.7203  | 0.82835 | 0.54735 | —      |
| Z-262 | 0.21545 | 0.14235 | 0.1518  | 0.4352  | 0.498   | 0.5098  | —      |
| Z-263 | 0.2176  | 0.20705 | 0.17805 | 0.5991  | 0.66525 | 0.68235 | —      |
| Z-27  | 0.15365 | 0.12485 | 0.1293  | 1.84135 | 1.8062  | 1.7312  | ND     |
| Z-34  | 0.2789  | 0.20765 | 0.19255 | 1.8773  | 1.79885 | 1.6591  | 365.27 |
| Z-35  | 0.22015 | 0.16155 | 0.1375  | 1.0025  | 0.9052  | 0.71785 | POS    |
| Z-36  | 0.14855 | 0.1264  | 0.1194  | 2.1073  | 1.9994  | 1.8656  | 365.27 |
| Z-37  | —       | —       | —       | —       | —       | —       | ND     |
| Z-38  | 0.1719  | 0.16195 | 0.14875 | 2.10595 | 2.0817  | 1.96995 | ND     |
| Z-39  | 0.16675 | 0.1427  | 0.1192  | 2.09365 | 1.9209  | 1.7449  | ND     |
| Z-40  | 0.17235 | 0.16625 | 0.14095 | 1.48305 | 1.4563  | 1.41175 | ND     |
| Z-41  | 0.3676  | 0.29905 | 0.2539  | 2.14975 | 2.1056  | 2.0478  | ND     |
| Z-42  | 0.67045 | 0.66385 | 0.7727  | 2.0505  | 1.95535 | 1.89305 | 465.1  |
| Z-43  | 0.1818  | 0.1472  | 0.14725 | 2.0818  | 2.10905 | 2.0259  | 91.12  |
| Z-44  | 0.4155  | 0.4032  | 0.3232  | 2.3109  | 2.2325  | 2.17765 | ND     |
| Z-45  | 0.48665 | 0.3742  | 0.34065 | 0.45845 | 0.4349  | 0.31215 | 201.6  |
| Z-46  | 0.2071  | 0.16555 | 0.1741  | 1.8365  | 1.85515 | 1.67285 | ND     |
| Z-47  | 0.15955 | 0.15785 | 0.1416  | 2.1065  | 2.0067  | 1.88715 | 360.25 |
| Z-48  | 0.24085 | 0.22315 | 0.23305 | 1.2557  | 1.44425 | 1.52445 | 123.75 |
| Z-49  | 0.11125 | 0.10595 | 0.1159  | 1.98955 | 2.0442  | 2.072   | ND     |
| Z-5   | 0.29525 | 0.17095 | 0.17285 | 1.65425 | 1.35015 | 1.66575 | ND     |
| Z-50  | 0.1386  | 0.11185 | 0.1124  | 0.43375 | 0.46675 | 0.44475 | ND     |
| Z-51  | 0.1436  | 0.1051  | 0.11255 | 1.29315 | 1.31895 | 1.3803  | ND     |
| Z-52  | 0.21265 | 0.1838  | 0.19555 | 1.44415 | 1.70945 | 1.83175 | ND     |
| Z-53  | 0.18045 | 0.17015 | 0.1329  | 0.1907  | 0.18475 | 0.1806  | 51.47  |
| Z-54  | 0.0749  | 0.09405 | 0.08075 | 2.09555 | 2.05075 | 2.02425 | 76.16  |
| Z-55  | 0.22445 | 0.25075 | 0.2255  | 1.71515 | 1.78425 | 1.79875 | 27.05  |
| Z-56  | 0.20445 | 0.19705 | 0.1481  | 1.82595 | 1.8049  | 1.8126  | 254.81 |
| Z-57  | 0.15025 | 0.1468  | 0.1024  | 2.07765 | 2.03085 | 1.97875 | ND     |

|      |         |         |         |         |         |         |         |
|------|---------|---------|---------|---------|---------|---------|---------|
| Z-58 | 0.15925 | 0.17075 | 0.1391  | 2.03995 | 2.0355  | 1.94085 | 469.02  |
| Z-59 | 0.1048  | 0.09575 | 0.0707  | 2.08135 | 2.0572  | 1.99555 | 108.6   |
| Z-6  | 0.19395 | 0.1413  | 0.1339  | 2.107   | 1.9163  | 2.0794  | 370.44  |
| Z-60 | 0.2042  | 0.17785 | 0.1629  | 1.7426  | 1.7212  | 1.6583  | ND      |
| Z-61 | 0.2194  | 0.23165 | 0.16095 | 0.47285 | 0.56115 | 0.64465 | 224.81  |
| Z-62 | 0.1419  | 0.144   | 0.1157  | 2.07165 | 2.0312  | 1.98715 | 152.12  |
| Z-63 | 0.25645 | 0.20925 | 0.15845 | 2.10235 | 2.0378  | 2.04585 | ND      |
| Z-64 | 0.1291  | 0.12755 | 0.0963  | 1.6099  | 1.65585 | 1.7214  | ND      |
| Z-66 | 0.2315  | 0.2182  | 0.15595 | 1.7724  | 1.7806  | 1.8385  | ND      |
| Z-67 | 0.16785 | 0.17585 | 0.1531  | 2.0853  | 2.0432  | 2.01585 | ND      |
| Z-68 | 0.21665 | 0.20305 | 0.1379  | 2.09215 | 2.0181  | 1.9697  | ND      |
| Z-69 | 0.31725 | 0.2699  | 0.2126  | 2.21645 | 2.26165 | 2.1225  | ND      |
| Z-70 | 0.32695 | 0.3293  | 0.2473  | 2.1993  | 2.11595 | 2.0914  | ND      |
| Z-71 | 0.2809  | 0.28905 | 0.21715 | 1.77255 | 1.82185 | 1.8841  | ND      |
| Z-72 | 0.0637  | 0.0516  | 0.059   | 0.94465 | 1.10855 | 1.27405 | 36.16   |
| Z-73 | 0.31675 | 0.2257  | 0.22825 | 1.6721  | 1.73375 | 1.7611  | 49.1    |
| Z-74 | 0.56095 | 0.59825 | 0.6439  | 1.5507  | 1.5711  | 1.6324  | 38.05   |
| Z-75 | 0.36255 | 0.2715  | 0.25755 | 1.504   | 1.5071  | 1.5382  | 658.88  |
| Z-76 | 0.1216  | 0.1092  | 0.09945 | 1.96815 | 1.91585 | 1.887   | 49.11   |
| Z-77 | 0.1078  | 0.1047  | 0.0757  | 0.22335 | 0.1913  | 0.1759  | 158.09  |
| Z-78 | 0.2708  | 0.2242  | 0.1825  | 2.20895 | 2.05345 | 2.0541  | 122.35  |
| Z-79 | 0.0883  | 0.07305 | 0.0625  | 2.0178  | 1.959   | 1.9714  | ND      |
| Z-8  | 0.1418  | 0.09255 | 0.0989  | 1.6074  | 1.45935 | 1.5757  | ND      |
| Z-80 | 0.44495 | 0.38285 | 0.35135 | 0.61575 | 0.5669  | 0.64285 | 2112.88 |
| Z-81 | 0.22855 | 0.18065 | 0.1472  | 1.6462  | 1.60735 | 1.7455  | POS     |
| Z-82 | 0.61205 | 0.4922  | 0.50405 | 0.5077  | 0.47085 | 0.49835 | 1008.49 |
| Z-83 | 0.2784  | 0.195   | 0.2174  | 0.25675 | 0.23915 | 0.26535 | 137.49  |
| Z-84 | 0.1354  | 0.09125 | 0.09075 | 0.65685 | 0.4402  | 0.6209  | 50.1    |
| Z-85 | 0.1751  | 0.1282  | 0.1181  | 1.57815 | 1.548   | 1.59465 | ND      |
| Z-86 | 0.201   | 0.13375 | 0.134   | 0.89355 | 0.4379  | 0.43415 | ND      |
| Z-87 | 0.31065 | 0.25375 | 0.2445  | 1.75145 | 1.7602  | 1.78615 | ND      |
| Z-88 | 0.22535 | 0.147   | 0.14695 | 1.76875 | 1.72965 | 1.7167  | 3184.7  |
| Z-89 | 0.0649  | 0.0559  | 0.0519  | 1.77665 | 1.7198  | 1.7254  | 20.77   |
| Z-9  | 0.2573  | 0.16085 | 0.1561  | 2.0518  | 1.97985 | 1.96435 | 433.98  |
| Z-90 | 0.17595 | 0.11085 | 0.078   | 1.591   | 1.59325 | 1.61665 | 182.59  |
| Z-91 | 0.51245 | 0.3611  | 0.28335 | 1.4643  | 1.5779  | 1.47095 | 495.49  |
| Z-92 | 0.1176  | 0.10955 | 0.09285 | 1.5224  | 1.5916  | 1.52355 | ND      |
| Z-93 | 0.0769  | 0.0652  | 0.05905 | 1.5744  | 1.59625 | 1.46795 | ND      |
| Z-94 | 0.15855 | 0.11015 | 0.0966  | 1.49695 | 1.6053  | 1.5803  | 24.22   |
| Z-95 | 0.46565 | 0.3215  | 0.2407  | 1.2856  | 1.41575 | 1.36525 | 905.43  |
| Z-96 | 0.1444  | 0.1057  | 0.0945  | 1.5691  | 1.66045 | 1.62075 | ND      |

|              |         |         |         |         |         |         |         |
|--------------|---------|---------|---------|---------|---------|---------|---------|
| <b>Z-97</b>  | 0.49495 | 0.53765 | 0.49565 | 1.8198  | 1.78635 | 1.84395 | 304.61  |
| <b>Z-98</b>  | 0.3182  | 0.20135 | 0.1508  | 1.6306  | 1.6692  | 1.5995  | ND      |
| <b>Z-99</b>  | 0.7843  | 0.97365 | 0.78625 | 1.54175 | 1.6126  | 1.53885 | 55.92   |
| <b>DR 1</b>  | 0.022   | 0.024   | 0.023   | 0.284   | 0.409   | 0.3765  | 30.47   |
| <b>DR 2</b>  | 0.098   | 0.095   | 0.096   | 0.763   | 0.7895  | 0.726   | –       |
| <b>DR 4</b>  | 0.043   | 0.056   | 0.058   | 0.035   | 0.0285  | 0.028   | ND      |
| <b>DR 7</b>  | –       | –       | –       | –       | –       | –       | 54.91   |
| <b>DR 8</b>  | 0.036   | 0.052   | 0.049   | 0.0265  | 0.023   | 0.0105  | 91.3    |
| <b>DR 9</b>  | –       | –       | –       | –       | –       | –       | 20.43   |
| <b>DR 10</b> | 0.0455  | 0.0375  | 0.042   | 0.669   | 0.772   | 0.7405  | ND      |
| <b>DR 11</b> | 0.0595  | 0.0875  | 0.0835  | 0.096   | 0.1285  | 0.0945  | 5.71    |
| <b>DR 12</b> | 0.013   | 0.0195  | 0.0185  | 0.241   | 0.2285  | 0.1585  | ND      |
| <b>DR 13</b> | 0.048   | 0.056   | 0.0525  | 0.5825  | 0.737   | 0.6345  | 66.81   |
| <b>DR 14</b> | 0.116   | 0.123   | 0.14    | 0.131   | 0.1625  | 0.1285  | 173.48  |
| <b>DR 15</b> | 0.0805  | 0.0805  | 0.0785  | 0.048   | 0.066   | 0.052   | 83.24   |
| <b>DR 17</b> | 0.0635  | 0.0845  | 0.08    | 1.253   | 1.2075  | 1.103   | 31.91   |
| <b>DR 18</b> | 0.067   | 0.071   | 0.0685  | 0.053   | 0.23    | 0.102   | 83.24   |
| <b>DR 19</b> | 0.055   | 0.0675  | 0.0655  | 0.393   | 0.495   | 0.465   | ND      |
| <b>DR 20</b> | 0.068   | 0.0715  | 0.071   | 1.2845  | 1.1915  | 0.878   | 2.37    |
| <b>DR 21</b> | 0.047   | 0.066   | 0.071   | 0.1     | 0.1575  | 0.076   | 20.64   |
| <b>DR 22</b> | 0.0645  | 0.0765  | 0.074   | 0.364   | 0.386   | 0.2585  | ND      |
| <b>DR 23</b> | 0.1195  | 0.1535  | 0.147   | 0.2815  | 0.388   | 0.2565  | 30.27   |
| <b>DR 24</b> | 0.1055  | 0.121   | 0.116   | 0.218   | 0.355   | 0.259   | 34.18   |
| <b>DR 25</b> | 0.0185  | 0.031   | 0.0305  | 0.0615  | 0.0735  | 0.054   | ND      |
| <b>DR 26</b> | 0.053   | 0.062   | 0.064   | 0.95    | 1.038   | 0.575   | ND      |
| <b>DR 27</b> | 0.0365  | 0.0425  | 0.043   | 0.0295  | 0.0235  | 0.0205  | ND      |
| <b>DR 28</b> | 0.053   | 0.075   | 0.074   | 0.044   | 0.033   | 0.013   | 73.3    |
| <b>DR 29</b> | 0.0835  | 0.0945  | 0.0955  | 0.06    | 0.0855  | 0.0305  | ND      |
| <b>DR 30</b> | 0.099   | 0.108   | 0.103   | 0.1915  | 0.162   | 0.077   | 9.26    |
| <b>DR 31</b> | 0.022   | 0.024   | 0.0245  | 0.042   | 0.055   | 0.0235  | 23.81   |
| <b>DR 32</b> | 0.027   | 0.039   | 0.0425  | 0.294   | 0.48    | 0.2655  | ND      |
| <b>DR 33</b> | 0.0605  | 0.0705  | 0.0685  | 0.327   | 0.4385  | 0.257   | ND      |
| <b>DR 34</b> | 0.1805  | 0.178   | 0.1735  | 0.99    | 0.925   | 0.4695  | 115.73  |
| <b>DR 35</b> | 0.115   | 0.12    | 0.1275  | 0.2825  | 0.5005  | 0.4775  | 4.97    |
| <b>DR 36</b> | 0.0375  | 0.064   | 0.038   | 0.233   | 0.308   | 0.1095  | 358.6   |
| <b>DR 37</b> | 0.1075  | 0.155   | 0.156   | 0.179   | 0.199   | 0.075   | 169.11  |
| <b>DR 38</b> | 0.0475  | 0.0625  | 0.0615  | 0.4125  | 0.3965  | 0.1735  | 1171.01 |
| <b>DR 39</b> | 0.06    | 0.086   | 0.084   | 0.414   | 0.5475  | 0.2575  | 65.48   |
| <b>DR 40</b> | 0.036   | 0.0525  | 0.056   | 0.0335  | 0.022   | 0.008   | 157.99  |
| <b>DR 41</b> | 0.1435  | 0.16    | 0.1485  | 0.047   | 0.0685  | 0.024   | 264.38  |

POS: Positive, but below limit of quantification. DR: Dominican Republic. 117-119= ZIKV NS1 W117A, G118A, K119A. 227-229= ZIKV NS1 H227A, T228A, L229A.
